# Supplementary material for: Loss of the DNA Methyltransferase MET1 Induces H3K9 Hypermethylation at PcG Target Genes and Redistribution of H3K27 Trimethylation to Transposons in Arabidopsis thaliana
Source: PLOS journal article supplement (doi:10.1371/journal.pgen.1003062), 2012-11-29
Supplement: S7 (10.1371/journal.pgen.1003062.s007) [file journal.pgen.1003062.s007]

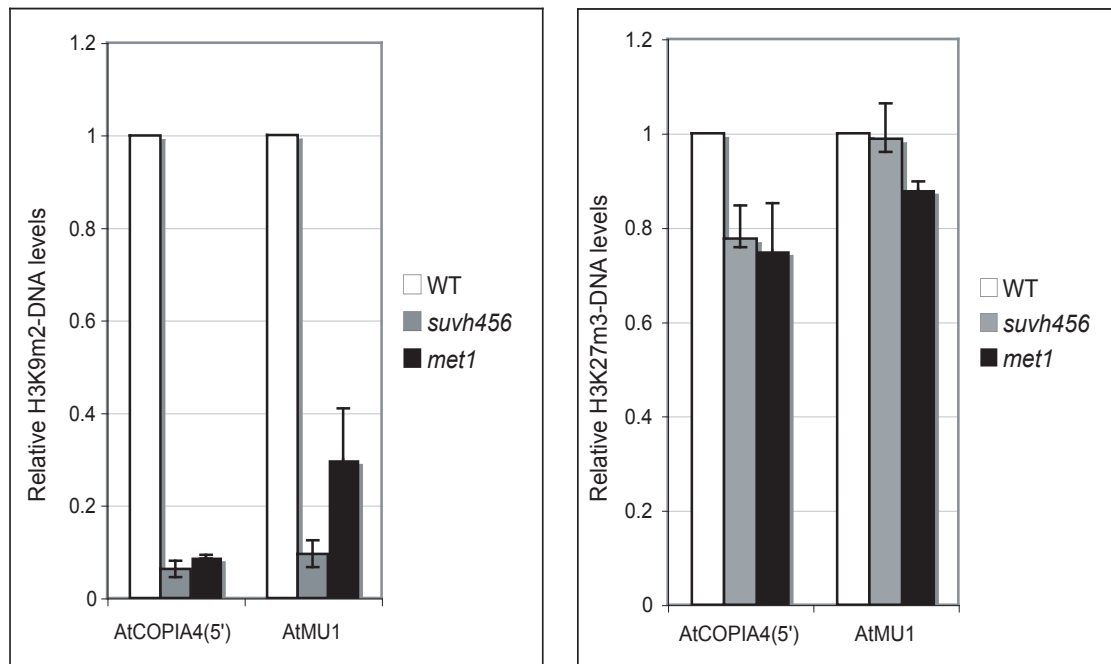

**Supplemental Figure 7.** Analysis of H3K9m2 and H3K27m3 marks at two transposons by ChIP followed by real-time PCR. Data were normalized to the input DNA and to an internal control (actin gene).
