# Supplementary material for: Loss of the DNA Methyltransferase MET1 Induces H3K9 Hypermethylation at PcG Target Genes and Redistribution of H3K27 Trimethylation to Transposons in Arabidopsis thaliana
Source: PLoS Genet. 2012 Nov 29;8(11):e1003062. doi: 10.1371/journal.pgen.1003062 (PMC3510029; doi:10.1371/journal.pgen.1003062)
Supplement: Table S3 — List of transposable elements and genes that gain H3K27m3 marks in met1. (XLSX) [file pgen.1003062.s012.xlsx]

## Sheet: Feuil1
AGI	strand	start	end
Tes
AT1TE01405	-	432995	433837
AT1TE03860	-	1184969	1185351
AT1TE04720	+	1443561	1443970
AT1TE04725	+	1444363	1444531
AT1TE07880	+	2415017	2416033
AT1TE09080	+	2788433	2800704
AT1TE12295	+	3780765	3785721
AT1TE12660	+	3894686	3894779
AT1TE12665	+	3895094	3897046
AT1TE14315	-	4405994	4411117
AT1TE16505	+	5100437	5100605
AT1TE19270	-	5958621	5959675
AT1TE21210	+	6538410	6543530
AT1TE21710	+	6704188	6709395
AT1TE21785	-	6734946	6735669
AT1TE23520	-	7285410	7286115
AT1TE23740	-	7352919	7365186
AT1TE24850	+	7714697	7722536
AT1TE25615	-	7960113	7961252
AT1TE25620	-	7961253	7961455
AT1TE27295	+	8453475	8461786
AT1TE27405	+	8490630	8492838
AT1TE27905	-	8644557	8645822
AT1TE28320	+	8778382	8778641
AT1TE28325	+	8778642	8778957
AT1TE28330	+	8779138	8779223
AT1TE28335	-	8779402	8779439
AT1TE28370	-	8790228	8797975
AT1TE28380	+	8793525	8794359
AT1TE28395	+	8800884	8801169
AT1TE28400	+	8801170	8801446
AT1TE28405	+	8801666	8801751
AT1TE28410	-	8801930	8801967
AT1TE28450	+	8815262	8815547
AT1TE28455	+	8815548	8815824
AT1TE28460	+	8816044	8816129
AT1TE28465	-	8816308	8816345
AT1TE28500	+	8829640	8829925
AT1TE28505	+	8829926	8830241
AT1TE28510	+	8830422	8830507
AT1TE28515	-	8830686	8830723
AT1TE30860	+	9582381	9582429
AT1TE30865	+	9582430	9582523
AT1TE30870	-	9582524	9582953
AT1TE31190	-	9676464	9691244
AT1TE33455	+	10347370	10348515
AT1TE33460	+	10348553	10348752
AT1TE34040	+	10531979	10532060
AT1TE34045	+	10532061	10533418
AT1TE34050	+	10533419	10533447
AT1TE34055	+	10533448	10533485
AT1TE35410	-	10966569	10966856
AT1TE35460	+	10982101	10982847
AT1TE35465	-	10982852	10983594
AT1TE36775	+	11368441	11369352
AT1TE37210	+	11504067	11505127
AT1TE37215	+	11505128	11507614
AT1TE37220	-	11508333	11508480
AT1TE37265	-	11517897	11521302
AT1TE37270	-	11521554	11521605
AT1TE37275	-	11521606	11523396
AT1TE37910	-	11704438	11704876
AT1TE38350	+	11834903	11836048
AT1TE38355	+	11836086	11836285
AT1TE38710	-	11960816	11961009
AT1TE38920	+	12013076	12013377
AT1TE38925	+	12013683	12014320
AT1TE38930	+	12014721	12014858
AT1TE38935	+	12015653	12016017
AT1TE38940	-	12016018	12020207
AT1TE38985	+	12031561	12033173
AT1TE39005	-	12038415	12039258
AT1TE39010	+	12039259	12040634
AT1TE39945	+	12291113	12291205
AT1TE39965	-	12297543	12297705
AT1TE40340	-	12403208	12404854
AT1TE40900	-	12554527	12555291
AT1TE40935	-	12565651	12565929
AT1TE40940	+	12566221	12568281
AT1TE40945	-	12568416	12568446
AT1TE40950	-	12569317	12569561
AT1TE40955	-	12569562	12572689
AT1TE40960	-	12572701	12572941
AT1TE40965	-	12573354	12573507
AT1TE40970	-	12574444	12574573
AT1TE40975	+	12574582	12574886
AT1TE40980	-	12576185	12576488
AT1TE40985	-	12576514	12576760
AT1TE40990	-	12577151	12577606
AT1TE41000	-	12581889	12582896
AT1TE41345	-	12664475	12673947
AT1TE41460	+	12713466	12728523
AT1TE41580	+	12755038	12760373
AT1TE41625	-	12768925	12779982
AT1TE41630	+	12772351	12773150
AT1TE41670	+	12786004	12786803
AT1TE41680	-	12792737	12793568
AT1TE41685	-	12793569	12793635
AT1TE41710	+	12802779	12803649
AT1TE41730	+	12810823	12811022
AT1TE41735	+	12813916	12816158
AT1TE41745	+	12818251	12839560
AT1TE41765	-	12830315	12832113
AT1TE41820	+	12847909	12849639
AT1TE41860	-	12856180	12862039
AT1TE41945	-	12886262	12886961
AT1TE42015	+	12899449	12899750
AT1TE42020	-	12899751	12899794
AT1TE42025	-	12899855	12900098
AT1TE42030	+	12900099	12900423
AT1TE42035	-	12900424	12900803
AT1TE42040	+	12901329	12901433
AT1TE42055	+	12904691	12905203
AT1TE42060	-	12905204	12905239
AT1TE42065	-	12905240	12905306
AT1TE42155	+	12930110	12930265
AT1TE42160	-	12930600	12931041
AT1TE42225	+	12949813	12953853
AT1TE42435	-	13017781	13017861
AT1TE42440	-	13019275	13019442
AT1TE42445	-	13019443	13021023
AT1TE42470	-	13023600	13023765
AT1TE42475	-	13023996	13024102
AT1TE42735	+	13085433	13085571
AT1TE42740	-	13085909	13086363
AT1TE42800	+	13098259	13102812
AT1TE42805	+	13103570	13103590
AT1TE42810	+	13103591	13104188
AT1TE42815	+	13105698	13105820
AT1TE42820	-	13107012	13107577
AT1TE42825	+	13108819	13109018
AT1TE42890	+	13131383	13139984
AT1TE42900	-	13145928	13146497
AT1TE42905	-	13146498	13146534
AT1TE42910	+	13148174	13148273
AT1TE42915	+	13149766	13150494
AT1TE42920	+	13150495	13151120
AT1TE42925	-	13151121	13151454
AT1TE42935	+	13155520	13156269
AT1TE43005	+	13172825	13172903
AT1TE43010	+	13172904	13178571
AT1TE43015	-	13178724	13178793
AT1TE43020	-	13178794	13179446
AT1TE43025	+	13179447	13180589
AT1TE43050	+	13187256	13192337
AT1TE43145	+	13213158	13214792
AT1TE43225	-	13232205	13236935
AT1TE43240	-	13237854	13238688
AT1TE43245	+	13238694	13239007
AT1TE43250	-	13239358	13240282
AT1TE43255	-	13239555	13239679
AT1TE43260	-	13239688	13239805
AT1TE43265	-	13241431	13241636
AT1TE43270	-	13241738	13241853
AT1TE43290	+	13246292	13246481
AT1TE43295	+	13246482	13248628
AT1TE43300	+	13248629	13248663
AT1TE43305	-	13248870	13251559
AT1TE43350	-	13262164	13264771
AT1TE43355	+	13264975	13277369
AT1TE43445	-	13300346	13302795
AT1TE43455	+	13302842	13303264
AT1TE43460	+	13303718	13304334
AT1TE43465	+	13304012	13304040
AT1TE43470	+	13304335	13304589
AT1TE43475	+	13304590	13304701
AT1TE43505	+	13311981	13312489
AT1TE43510	+	13312809	13313700
AT1TE43515	+	13313701	13313798
AT1TE43585	+	13325970	13330851
AT1TE43635	-	13346933	13348689
AT1TE43640	+	13348957	13350596
AT1TE43645	-	13350598	13350991
AT1TE43650	-	13352843	13352982
AT1TE43655	+	13353030	13353360
AT1TE43660	-	13353908	13354213
AT1TE43665	-	13354215	13354387
AT1TE43670	-	13355148	13356304
AT1TE43805	+	13398752	13401988
AT1TE43820	+	13402888	13403882
AT1TE43880	-	13418870	13422701
AT1TE43895	+	13424230	13424601
AT1TE43900	-	13424615	13425619
AT1TE43910	+	13427670	13431395
AT1TE43915	-	13432022	13432186
AT1TE43920	+	13432841	13433038
AT1TE43925	+	13434215	13434545
AT1TE43930	+	13434546	13434832
AT1TE43935	+	13434833	13434870
AT1TE43940	+	13435664	13435815
AT1TE44125	-	13483960	13491638
AT1TE44130	-	13491833	13492036
AT1TE44135	+	13494421	13494562
AT1TE44175	-	13498776	13499744
AT1TE44180	+	13500942	13502061
AT1TE44200	-	13504979	13505477
AT1TE44205	-	13505478	13506273
AT1TE44210	-	13506274	13506299
AT1TE44215	-	13506306	13507961
AT1TE44230	-	13508992	13517176
AT1TE44255	-	13521771	13525337
AT1TE44260	-	13525338	13526192
AT1TE44265	-	13526226	13528837
AT1TE44450	-	13574637	13577338
AT1TE44455	-	13577339	13582737
AT1TE44515	-	13593844	13594031
AT1TE44520	+	13594059	13594269
AT1TE44595	+	13617956	13618165
AT1TE44600	+	13618574	13618845
AT1TE44605	+	13619009	13624385
AT1TE44630	-	13626402	13633984
AT1TE44645	-	13639414	13639515
AT1TE44650	+	13639926	13640109
AT1TE44705	-	13655858	13656823
AT1TE44710	+	13657875	13657978
AT1TE44715	+	13660091	13660481
AT1TE44720	+	13660485	13668769
AT1TE44725	-	13668771	13669362
AT1TE44825	+	13691931	13694419
AT1TE44830	+	13694420	13694521
AT1TE44890	-	13708636	13709347
AT1TE44895	+	13709354	13710970
AT1TE44900	-	13711066	13711240
AT1TE44940	-	13718453	13719778
AT1TE44945	+	13720712	13722875
AT1TE44950	+	13720898	13721254
AT1TE44955	+	13723122	13723191
AT1TE44960	+	13723857	13723920
AT1TE44965	+	13724402	13725406
AT1TE44970	+	13725779	13725831
AT1TE44975	+	13726617	13727007
AT1TE44980	-	13727008	13729347
AT1TE44985	+	13731603	13732536
AT1TE44990	-	13733012	13733468
AT1TE44995	+	13733724	13733918
AT1TE45000	-	13733919	13733946
AT1TE45005	+	13734133	13734181
AT1TE45010	+	13734182	13735703
AT1TE45020	-	13735892	13744413
AT1TE45025	+	13744730	13745076
AT1TE45030	+	13745382	13745727
AT1TE45090	+	13758335	13760011
AT1TE45095	-	13760892	13761187
AT1TE45100	-	13761188	13762286
AT1TE45105	+	13762287	13762320
AT1TE45110	+	13762321	13763033
AT1TE45115	+	13763034	13763086
AT1TE45120	+	13765530	13767026
AT1TE45125	+	13767027	13767100
AT1TE45145	-	13778823	13787061
AT1TE45150	-	13781178	13782381
AT1TE45280	+	13813175	13813975
AT1TE45285	-	13814116	13814329
AT1TE45290	-	13814574	13814635
AT1TE45295	-	13814636	13815105
AT1TE45300	-	13815106	13815169
AT1TE45310	+	13819725	13819771
AT1TE45315	+	13819772	13825039
AT1TE45320	+	13825040	13825101
AT1TE45330	-	13826338	13827401
AT1TE45335	-	13827402	13827947
AT1TE45355	+	13829697	13833361
AT1TE45360	-	13833388	13835476
AT1TE45365	-	13835477	13837002
AT1TE45400	+	13850627	13850735
AT1TE45430	-	13855642	13856895
AT1TE45490	+	13870733	13871077
AT1TE45500	-	13871674	13871900
AT1TE45505	+	13871901	13872020
AT1TE45515	-	13874649	13877652
AT1TE45520	-	13879872	13880142
AT1TE45525	-	13880143	13880246
AT1TE45555	-	13883877	13884194
AT1TE45560	+	13884285	13892174
AT1TE45710	-	13921934	13923322
AT1TE45735	+	13929955	13937200
AT1TE45795	-	13948245	13951927
AT1TE45800	-	13951930	13956865
AT1TE45815	-	13960650	13962486
AT1TE45835	+	13965918	13966040
AT1TE45840	-	13967436	13967606
AT1TE45845	-	13967665	13968913
AT1TE45850	-	13968948	13969322
AT1TE45855	-	13969323	13980234
AT1TE45860	+	13973205	13975240
AT1TE45880	-	13980241	13980298
AT1TE45910	+	13986909	13987316
AT1TE45920	-	13990714	13990785
AT1TE45925	+	13991353	13991465
AT1TE45930	+	13991466	13991677
AT1TE45935	+	13991678	13991711
AT1TE45940	+	13991769	13991854
AT1TE45945	-	13992753	13992795
AT1TE45950	-	13992796	13992900
AT1TE45955	-	13992901	13996458
AT1TE45960	-	13996459	13997389
AT1TE45965	-	13997390	13998968
AT1TE45970	-	13999128	14000519
AT1TE45975	+	14003481	14004628
AT1TE45985	+	14009142	14009273
AT1TE45990	+	14009324	14009570
AT1TE45995	+	14009778	14010213
AT1TE46000	-	14010223	14010449
AT1TE46005	-	14010530	14010694
AT1TE46010	-	14011413	14011441
AT1TE46015	-	14011442	14011523
AT1TE46030	-	14013781	14016745
AT1TE46045	+	14020198	14020797
AT1TE46125	-	14045142	14045215
AT1TE46130	-	14045706	14046161
AT1TE46135	-	14046162	14046378
AT1TE46180	-	14058858	14060873
AT1TE46185	+	14061445	14061508
AT1TE46190	+	14061511	14063053
AT1TE46210	-	14064535	14064729
AT1TE46215	+	14064748	14066355
AT1TE46220	-	14066798	14069923
AT1TE46230	+	14071941	14073262
AT1TE46235	+	14073263	14077868
AT1TE46240	+	14077869	14077904
AT1TE46245	+	14077905	14078826
AT1TE46255	-	14079384	14082675
AT1TE46270	+	14096510	14099945
AT1TE46285	+	14099946	14099966
AT1TE46290	+	14100033	14100352
AT1TE46295	-	14100353	14100983
AT1TE46310	-	14104264	14110014
AT1TE46330	-	14111455	14115001
AT1TE46415	+	14141671	14141936
AT1TE46420	+	14141937	14142116
AT1TE46425	+	14142175	14142317
AT1TE46430	+	14142574	14143380
AT1TE46440	-	14146650	14146747
AT1TE46445	-	14146748	14148135
AT1TE46625	+	14190558	14195571
AT1TE46635	-	14199364	14209387
AT1TE46640	+	14209580	14210789
AT1TE46660	+	14215140	14217186
AT1TE46680	+	14228098	14229141
AT1TE46795	+	14264621	14265969
AT1TE46825	+	14276397	14279985
AT1TE46830	-	14279992	14284579
AT1TE46835	-	14282616	14284250
AT1TE46840	-	14284741	14284812
AT1TE46845	-	14284854	14285079
AT1TE46850	-	14285350	14285751
AT1TE46860	-	14288811	14288880
AT1TE46865	-	14288921	14289146
AT1TE46870	-	14289526	14290198
AT1TE46950	-	14301227	14302712
AT1TE46955	-	14302713	14302847
AT1TE46960	+	14304090	14304855
AT1TE46965	+	14304856	14304888
AT1TE46970	+	14304968	14305309
AT1TE46975	+	14305651	14305765
AT1TE47020	+	14312878	14314120
AT1TE47025	+	14314121	14314163
AT1TE47030	+	14314164	14314282
AT1TE47035	+	14314292	14330093
AT1TE47050	+	14317631	14323291
AT1TE47075	+	14330149	14330560
AT1TE47085	+	14332446	14332854
AT1TE47090	-	14333335	14333431
AT1TE47095	-	14333446	14334989
AT1TE47105	+	14336777	14343134
AT1TE47195	+	14355621	14356418
AT1TE47200	+	14356419	14356879
AT1TE47205	+	14357306	14357359
AT1TE47210	+	14357360	14357844
AT1TE47220	+	14358086	14359242
AT1TE47265	-	14368842	14370100
AT1TE47270	-	14369819	14369907
AT1TE47275	-	14370101	14370818
AT1TE47300	+	14381513	14381696
AT1TE47370	+	14397717	14397770
AT1TE47410	+	14400700	14401569
AT1TE47415	+	14401274	14402071
AT1TE47420	+	14402072	14402532
AT1TE47435	+	14403498	14403738
AT1TE47440	+	14403739	14404895
AT1TE47485	-	14414495	14415753
AT1TE47490	-	14415472	14415560
AT1TE47495	-	14415754	14416471
AT1TE47520	+	14427166	14427349
AT1TE47630	+	14466651	14467991
AT1TE47635	+	14468616	14468860
AT1TE47640	+	14468861	14469971
AT1TE47685	-	14479272	14480530
AT1TE47690	-	14480531	14481168
AT1TE47705	+	14484220	14484403
AT1TE47715	+	14487313	14489113
AT1TE47880	-	14541383	14543427
AT1TE47885	-	14542492	14542538
AT1TE48035	-	14592609	14601170
AT1TE48045	+	14602553	14605256
AT1TE48050	-	14605640	14611085
AT1TE48755	+	14865362	14865543
AT1TE48870	+	14919772	14919794
AT1TE48875	-	14919795	14920144
AT1TE48880	-	14921094	14921687
AT1TE48885	-	14921753	14921986
AT1TE48895	-	14925263	14925511
AT1TE48900	+	14925880	14926046
AT1TE48905	+	14926047	14929404
AT1TE49145	+	15002169	15002515
AT1TE49165	+	15011071	15011997
AT1TE49170	-	15011998	15012027
AT1TE49265	+	15056118	15059006
AT1TE49270	+	15059007	15059065
AT1TE49275	-	15059487	15059509
AT1TE49280	-	15059510	15060689
AT1TE49285	-	15060690	15062538
AT1TE49360	+	15089698	15090021
AT1TE49365	-	15090283	15090314
AT1TE49370	-	15090315	15092380
AT1TE49375	-	15092381	15094020
AT1TE49380	-	15092790	15092959
AT1TE49385	-	15094292	15096270
AT1TE49390	-	15095452	15095796
AT1TE49395	-	15096271	15096484
AT1TE49400	-	15096485	15096510
AT1TE49405	-	15096511	15097768
AT1TE49410	-	15097769	15100880
AT1TE49415	-	15099144	15099629
AT1TE49420	-	15099630	15100396
AT1TE49425	-	15100881	15103407
AT1TE49430	-	15103408	15104551
AT1TE49435	-	15104552	15105683
AT1TE49440	-	15105684	15105747
AT1TE49445	-	15106030	15106050
AT1TE49450	-	15106051	15107355
AT1TE49455	-	15107356	15108516
AT1TE49460	-	15108783	15109469
AT1TE49465	-	15109470	15110154
AT1TE49470	-	15110155	15110634
AT1TE49475	-	15110635	15111293
AT1TE49480	-	15111294	15114679
AT1TE49485	-	15113059	15113339
AT1TE49490	-	15113558	15113692
AT1TE49495	-	15114680	15114955
AT1TE49500	-	15114956	15116375
AT1TE49505	-	15115541	15115656
AT1TE49510	-	15116376	15118627
AT1TE49515	-	15117227	15117632
AT1TE49520	-	15118628	15119223
AT1TE49525	-	15119508	15119750
AT1TE49530	-	15119751	15120942
AT1TE49535	-	15120943	15121167
AT1TE49540	-	15121168	15124976
AT1TE49545	-	15121251	15122092
AT1TE49550	-	15123942	15124459
AT1TE49555	-	15124492	15124713
AT1TE49560	-	15124977	15126718
AT1TE49565	-	15125525	15125640
AT1TE49570	-	15126719	15129608
AT1TE49575	-	15126977	15127201
AT1TE49580	-	15129609	15129994
AT1TE49585	-	15130261	15130297
AT1TE49590	-	15130298	15131211
AT1TE49595	-	15131212	15132891
AT1TE49600	-	15132369	15132590
AT1TE49605	-	15133112	15134874
AT1TE49610	-	15133420	15133670
AT1TE49615	-	15133671	15134862
AT1TE49620	-	15134945	15135075
AT1TE49625	-	15135088	15135169
AT1TE49630	-	15135170	15136307
AT1TE49635	-	15136308	15136529
AT1TE49640	-	15136530	15136829
AT1TE49645	-	15137340	15137455
AT1TE49650	-	15137609	15138904
AT1TE49655	-	15138905	15139112
AT1TE49660	-	15139113	15139410
AT1TE49665	-	15139872	15141099
AT1TE49670	+	15141276	15141508
AT1TE49675	+	15142137	15144893
AT1TE49680	+	15144894	15145282
AT1TE49685	+	15145283	15145313
AT1TE49690	-	15145546	15145613
AT1TE49695	-	15145614	15146887
AT1TE49700	-	15146888	15147387
AT1TE49705	-	15147388	15147651
AT1TE49710	-	15147662	15148160
AT1TE49715	-	15148161	15152132
AT1TE49720	-	15148439	15149064
AT1TE49725	-	15149785	15150249
AT1TE49730	+	15152196	15152334
AT1TE49735	+	15153192	15153502
AT1TE49740	+	15153503	15160636
AT1TE49750	+	15160637	15160736
AT1TE49755	+	15163298	15169004
AT1TE49760	-	15169196	15169229
AT1TE49765	-	15169230	15171558
AT1TE49770	-	15170556	15170769
AT1TE49775	-	15170770	15170987
AT1TE49780	-	15171559	15174112
AT1TE49785	-	15172137	15172524
AT1TE49790	-	15172525	15172762
AT1TE49795	-	15174512	15174745
AT1TE49800	-	15174746	15175017
AT1TE49805	-	15175018	15175903
AT1TE49810	-	15175904	15177265
AT1TE49815	-	15176762	15177033
AT1TE49820	-	15177034	15177073
AT1TE49825	-	15177266	15178124
AT1TE49830	-	15179265	15180777
AT1TE49835	-	15179849	15180111
AT1TE49840	-	15180971	15181253
AT1TE49845	+	15181378	15189433
AT1TE49855	-	15195470	15195608
AT1TE49860	-	15196011	15196463
AT1TE49865	-	15196464	15197116
AT1TE49870	-	15197117	15199437
AT1TE49875	-	15199438	15200182
AT1TE49880	-	15199662	15199939
AT1TE49885	-	15200183	15201996
AT1TE49890	-	15201997	15202084
AT1TE49895	-	15202464	15202977
AT1TE49900	-	15202978	15203946
AT1TE49905	-	15203947	15203977
AT1TE49910	-	15204396	15204643
AT1TE49915	-	15204644	15204926
AT1TE49920	-	15204927	15207338
AT1TE49925	-	15207339	15208156
AT1TE49930	-	15207634	15207841
AT1TE49935	-	15208157	15208376
AT1TE49940	-	15208901	15208947
AT1TE49945	-	15208948	15210286
AT1TE49950	-	15210641	15211752
AT1TE49955	+	15211753	15218409
AT1TE49960	-	15218410	15222448
AT1TE49965	-	15219819	15219849
AT1TE49970	-	15222742	15222766
AT1TE49975	-	15222767	15223430
AT1TE49980	-	15223846	15223902
AT1TE49985	-	15224392	15224425
AT1TE49990	-	15224426	15226384
AT1TE49995	-	15225425	15225454
AT1TE50000	-	15226385	15227660
AT1TE50005	-	15228173	15228420
AT1TE50010	-	15228421	15228674
AT1TE50015	-	15228675	15229678
AT1TE50020	-	15229679	15232128
AT1TE50025	-	15231108	15231491
AT1TE50030	-	15232129	15232368
AT1TE50035	-	15232369	15232849
AT1TE50040	-	15232850	15233274
AT1TE50045	-	15233577	15233606
AT1TE50050	-	15233607	15234507
AT1TE50055	-	15234508	15235877
AT1TE50060	-	15235878	15236353
AT1TE50065	-	15236354	15236832
AT1TE50070	-	15236891	15237105
AT1TE50075	-	15237106	15237530
AT1TE50080	-	15237803	15238297
AT1TE50085	-	15238298	15239283
AT1TE50090	-	15238835	15239063
AT1TE50095	-	15239284	15239365
AT1TE50100	-	15239366	15240469
AT1TE50105	-	15240470	15242862
AT1TE50110	-	15242863	15242907
AT1TE50115	+	15242979	15247058
AT1TE50120	-	15247285	15247351
AT1TE50125	-	15247352	15247574
AT1TE50130	-	15247575	15248031
AT1TE50135	-	15248032	15248191
AT1TE50140	-	15248465	15250455
AT1TE50145	-	15250456	15254532
AT1TE50150	-	15250756	15251386
AT1TE50155	-	15251387	15251628
AT1TE50160	-	15253567	15253808
AT1TE50165	-	15254533	15255735
AT1TE50170	-	15256379	15256660
AT1TE50175	-	15256723	15259718
AT1TE50180	-	15257008	15257227
AT1TE50185	-	15259719	15261118
AT1TE50190	-	15260175	15260348
AT1TE50195	-	15260363	15260580
AT1TE50200	-	15260581	15260660
AT1TE50205	-	15261134	15261402
AT1TE50210	-	15261623	15262029
AT1TE50215	-	15262301	15262367
AT1TE50220	-	15262368	15266338
AT1TE50225	-	15263631	15263863
AT1TE50230	-	15263864	15264270
AT1TE50235	-	15264551	15265633
AT1TE50240	-	15266339	15267001
AT1TE50245	-	15267002	15267305
AT1TE50250	-	15267306	15269630
AT1TE50255	-	15269631	15269917
AT1TE50260	-	15269918	15272024
AT1TE50265	-	15272025	15272407
AT1TE50270	-	15273007	15276695
AT1TE50275	-	15273991	15276329
AT1TE50280	-	15277308	15279464
AT1TE50285	-	15278307	15278879
AT1TE50290	+	15279602	15279747
AT1TE50295	+	15279974	15280233
AT1TE50300	-	15280431	15281457
AT1TE50305	-	15281458	15282518
AT1TE50310	+	15282864	15282889
AT1TE50315	+	15282890	15291952
AT1TE50320	+	15288227	15288357
AT1TE50330	-	15291953	15292300
AT1TE50335	-	15292301	15293032
AT1TE50340	-	15293625	15294504
AT1TE50345	+	15294601	15299135
AT1TE50350	-	15299299	15299490
AT1TE50355	-	15299697	15299767
AT1TE50360	-	15299768	15299801
AT1TE50365	-	15299802	15302160
AT1TE50370	-	15302161	15302714
AT1TE50375	+	15302715	15310483
AT1TE50380	-	15310485	15310980
AT1TE50385	-	15310981	15312695
AT1TE50390	-	15312696	15313348
AT1TE50395	-	15314338	15314459
AT1TE50410	-	15315974	15316004
AT1TE50415	-	15316005	15318603
AT1TE50420	-	15318897	15318921
AT1TE50425	-	15318922	15319585
AT1TE50430	-	15320001	15320060
AT1TE50435	-	15320547	15322058
AT1TE50440	-	15320795	15321144
AT1TE50445	-	15321145	15322348
AT1TE50450	-	15322349	15323786
AT1TE50455	-	15323787	15323827
AT1TE50460	-	15324373	15324568
AT1TE50465	-	15325508	15325981
AT1TE50470	-	15325982	15327410
AT1TE50475	-	15327411	15328388
AT1TE50480	-	15328389	15328431
AT1TE50485	-	15328432	15329969
AT1TE50490	-	15329533	15329767
AT1TE50495	-	15329970	15333472
AT1TE50500	-	15332160	15332500
AT1TE50505	-	15332501	15332740
AT1TE50510	-	15333473	15334224
AT1TE50515	-	15334225	15334649
AT1TE50520	-	15334922	15334951
AT1TE50525	-	15334952	15335175
AT1TE50530	-	15335417	15335487
AT1TE50535	-	15335488	15337795
AT1TE50540	-	15337796	15338570
AT1TE50545	-	15338571	15338977
AT1TE50550	-	15339362	15340001
AT1TE50555	-	15340002	15340026
AT1TE50560	+	15340098	15344177
AT1TE50565	-	15344423	15344470
AT1TE50570	-	15344471	15344513
AT1TE50575	-	15344514	15346806
AT1TE50580	-	15345839	15346065
AT1TE50585	-	15346066	15346136
AT1TE50590	-	15347097	15347818
AT1TE50595	-	15347819	15347874
AT1TE50600	-	15347875	15347979
AT1TE50610	-	15349224	15349290
AT1TE50615	-	15349291	15351905
AT1TE50620	-	15349306	15350994
AT1TE50625	-	15351906	15352406
AT1TE50630	-	15352407	15352629
AT1TE50635	-	15352630	15353836
AT1TE50640	-	15354476	15354757
AT1TE50645	-	15354820	15354887
AT1TE50650	-	15354888	15357295
AT1TE50655	-	15355099	15355323
AT1TE50660	-	15357521	15357931
AT1TE50665	-	15358265	15360174
AT1TE50670	-	15359489	15359719
AT1TE50675	-	15359720	15360126
AT1TE50680	-	15360398	15361124
AT1TE50685	-	15361125	15363365
AT1TE50690	-	15362368	15362639
AT1TE50695	-	15363366	15363641
AT1TE50700	-	15363642	15369539
AT1TE50705	-	15363933	15364240
AT1TE50710	-	15366168	15367798
AT1TE50715	-	15367799	15368014
AT1TE50720	-	15368015	15368684
AT1TE50725	-	15368685	15368846
AT1TE50730	-	15369540	15369778
AT1TE50735	-	15369779	15370504
AT1TE50740	-	15371104	15374792
AT1TE50745	-	15372088	15374426
AT1TE50750	-	15375405	15377601
AT1TE50755	-	15376404	15376976
AT1TE50760	+	15377699	15378330
AT1TE50765	-	15378528	15380622
AT1TE50770	+	15380968	15380993
AT1TE50775	+	15380994	15390056
AT1TE50780	+	15386331	15386461
AT1TE50790	-	15390057	15391136
AT1TE50795	-	15391729	15400796
AT1TE50800	+	15392704	15397238
AT1TE50805	-	15397397	15398068
AT1TE50810	+	15400797	15408565
AT1TE50815	-	15408566	15408945
AT1TE50820	-	15408946	15408980
AT1TE50825	-	15408981	15409088
AT1TE50830	-	15409089	15410777
AT1TE50835	-	15410778	15410921
AT1TE50840	-	15411246	15411430
AT1TE50845	-	15412420	15412541
AT1TE50850	+	15412545	15413485
AT1TE50855	-	15414550	15415161
AT1TE50880	+	15423268	15423392
AT1TE50885	-	15423393	15424299
AT1TE50890	-	15424300	15430452
AT1TE50895	+	15424521	15426151
AT1TE50900	+	15427424	15428617
AT1TE50905	-	15428618	15430237
AT1TE50910	-	15430747	15430910
AT1TE50915	-	15430911	15431996
AT1TE50920	-	15431997	15432086
AT1TE50925	-	15432087	15432855
AT1TE50930	-	15432856	15433093
AT1TE50935	-	15433094	15433847
AT1TE50940	-	15434115	15434142
AT1TE50945	-	15434143	15435447
AT1TE50950	-	15435456	15435491
AT1TE50955	-	15437228	15438006
AT1TE50960	-	15437614	15437731
AT1TE50965	+	15438877	15439083
AT1TE50970	+	15440616	15440934
AT1TE50975	+	15441287	15443344
AT1TE50980	+	15443654	15443735
AT1TE50985	-	15444005	15446062
AT1TE50990	-	15446736	15446928
AT1TE50995	+	15446933	15447255
AT1TE51020	-	15453296	15456743
AT1TE51025	-	15456744	15456832
AT1TE51030	+	15457266	15457354
AT1TE51035	+	15457612	15457928
AT1TE51085	-	15521892	15524749
AT1TE51090	+	15526033	15526491
AT1TE51095	-	15526492	15526518
AT1TE51100	-	15526519	15527444
AT1TE51105	+	15527847	15532515
AT1TE51110	+	15528844	15528866
AT1TE51120	-	15532516	15536257
AT1TE51125	-	15532866	15535360
AT1TE51135	+	15536341	15536594
AT1TE51140	+	15536597	15537898
AT1TE51170	+	15549045	15549715
AT1TE51175	+	15549716	15552232
AT1TE51180	+	15550895	15551223
AT1TE51185	+	15552237	15553104
AT1TE51235	-	15563126	15571625
AT1TE51245	+	15564480	15569532
AT1TE51260	+	15572920	15584230
AT1TE51265	+	15574821	15582459
AT1TE51270	+	15584231	15584493
AT1TE51275	-	15584504	15587473
AT1TE51280	-	15587474	15587560
AT1TE51285	+	15587589	15589238
AT1TE51290	-	15589239	15589383
AT1TE51295	+	15591429	15592702
AT1TE51315	+	15597367	15601274
AT1TE51330	-	15604510	15604720
AT1TE51355	-	15612959	15613067
AT1TE51360	-	15613068	15617844
AT1TE51365	-	15617845	15617890
AT1TE51405	+	15626922	15628078
AT1TE51410	+	15628088	15628128
AT1TE51420	+	15629809	15631526
AT1TE51425	+	15631527	15632143
AT1TE51430	-	15632934	15633426
AT1TE51435	+	15633427	15634636
AT1TE51440	-	15634651	15635253
AT1TE51445	-	15635254	15635330
AT1TE51450	-	15636038	15636099
AT1TE51455	-	15636793	15636818
AT1TE51460	-	15636819	15636875
AT1TE51465	-	15636876	15638967
AT1TE51495	+	15644372	15644505
AT1TE51500	+	15644678	15644720
AT1TE51505	+	15644721	15644802
AT1TE51515	+	15644855	15645809
AT1TE51520	+	15645810	15646277
AT1TE51525	+	15646392	15647611
AT1TE51530	+	15646980	15647202
AT1TE51535	-	15647749	15648049
AT1TE51540	-	15648242	15648456
AT1TE51545	-	15648562	15649527
AT1TE51550	+	15649530	15649729
AT1TE51555	+	15649730	15651599
AT1TE51560	-	15651624	15652316
AT1TE51615	+	15667497	15676852
AT1TE51745	+	15719621	15722163
AT1TE51775	+	15728043	15729867
AT1TE51850	+	15752705	15758145
AT1TE51880	+	15762685	15763497
AT1TE51885	+	15763153	15763425
AT1TE51890	+	15763526	15763617
AT1TE51895	-	15763722	15763772
AT1TE51900	-	15763773	15764695
AT1TE51905	-	15764716	15765366
AT1TE51910	-	15765385	15768935
AT1TE51915	+	15765786	15765968
AT1TE51920	+	15766893	15767323
AT1TE51925	-	15767356	15767409
AT1TE51930	+	15768180	15768348
AT1TE51935	-	15768371	15768395
AT1TE51940	-	15768936	15768980
AT1TE51945	-	15768997	15769779
AT1TE51950	-	15769780	15770909
AT1TE51955	-	15770913	15770937
AT1TE51960	-	15770938	15773177
AT1TE51965	+	15773205	15773527
AT1TE51970	-	15773528	15774543
AT1TE51975	-	15774544	15774973
AT1TE51980	+	15774987	15775415
AT1TE51985	+	15775426	15792577
AT1TE52000	-	15792578	15794347
AT1TE52005	+	15794358	15795109
AT1TE52010	-	15795110	15797267
AT1TE52015	-	15797268	15798116
AT1TE52020	+	15798117	15801954
AT1TE52025	+	15801955	15809903
AT1TE52030	+	15809904	15810310
AT1TE52035	-	15810311	15810749
AT1TE52040	+	15810750	15812077
AT1TE52045	+	15812078	15812482
AT1TE52050	-	15812483	15813679
AT1TE52055	+	15813680	15815659
AT1TE52060	+	15814423	15814495
AT1TE52065	-	15815669	15815756
AT1TE52070	-	15815757	15816884
AT1TE52075	+	15818010	15818661
AT1TE52085	-	15818763	15823755
AT1TE52095	+	15821987	15823565
AT1TE52170	-	15855171	15858013
AT1TE52180	+	15858014	15858654
AT1TE52200	+	15859712	15875090
AT1TE52220	+	15875413	15881738
AT1TE52260	-	15885210	15885574
AT1TE52265	+	15885575	15885809
AT1TE52270	-	15888032	15888115
AT1TE52275	-	15888584	15888749
AT1TE52285	-	15889541	15889778
AT1TE52290	-	15890142	15890300
AT1TE52375	-	15909073	15909931
AT1TE52380	+	15911395	15911493
AT1TE52385	+	15911494	15912295
AT1TE52390	+	15912727	15912771
AT1TE52395	+	15912772	15912825
AT1TE52400	+	15912826	15913550
AT1TE52405	+	15912983	15913141
AT1TE52410	+	15913142	15913163
AT1TE52415	+	15913935	15913974
AT1TE52420	+	15913975	15919902
AT1TE52425	+	15916488	15916825
AT1TE52435	+	15919903	15919949
AT1TE52450	-	15922148	15922367
AT1TE52455	-	15923054	15923081
AT1TE52460	-	15923082	15923321
AT1TE52465	-	15923322	15923402
AT1TE52470	+	15924362	15924641
AT1TE52575	+	15951914	15952235
AT1TE52580	+	15952236	15952262
AT1TE52585	-	15952263	15952405
AT1TE52590	-	15953044	15960758
AT1TE52610	+	15964020	15967482
AT1TE52620	-	15971159	15972580
AT1TE52625	-	15971603	15971681
AT1TE52630	-	15972581	15973023
AT1TE52635	-	15973706	15973840
AT1TE52640	-	15973841	15974507
AT1TE52690	+	15987270	15988169
AT1TE52700	+	15989700	15991231
AT1TE52705	+	15991232	15991280
AT1TE52710	-	15993783	15993920
AT1TE52715	-	15993960	15995238
AT1TE52720	-	15996213	15996304
AT1TE52725	+	15997428	15997628
AT1TE52730	-	15998112	15998345
AT1TE52740	-	16003375	16005471
AT1TE52745	-	16005946	16007414
AT1TE52750	-	16007415	16007779
AT1TE52755	+	16008001	16008279
AT1TE52760	+	16008647	16008976
AT1TE52765	+	16009523	16011313
AT1TE52770	+	16011314	16011488
AT1TE52775	-	16011744	16012416
AT1TE52780	-	16012417	16014075
AT1TE52785	-	16014076	16014113
AT1TE52790	-	16014473	16014855
AT1TE52795	-	16015025	16022139
AT1TE52800	+	16023352	16023385
AT1TE52805	-	16023386	16023590
AT1TE52810	+	16025568	16026713
AT1TE52815	+	16027747	16028016
AT1TE52820	-	16028017	16028039
AT1TE52825	+	16031015	16031478
AT1TE52835	+	16036846	16037159
AT1TE52840	-	16037160	16037427
AT1TE52845	+	16037428	16039471
AT1TE52850	+	16039472	16039537
AT1TE52860	+	16041348	16047774
AT1TE52875	-	16055526	16056154
AT1TE52880	+	16056961	16058194
AT1TE52935	+	16079779	16079862
AT1TE52940	-	16081167	16082071
AT1TE52945	+	16082072	16082971
AT1TE52950	+	16082974	16091507
AT1TE52955	+	16091508	16091537
AT1TE52960	+	16091542	16092435
AT1TE53030	-	16108671	16112411
AT1TE53035	-	16112412	16112727
AT1TE53040	-	16112728	16112750
AT1TE53045	+	16112751	16113095
AT1TE53050	+	16113096	16114763
AT1TE53055	+	16114764	16114795
AT1TE53060	+	16114796	16115862
AT1TE53065	+	16115863	16117224
AT1TE53070	-	16118258	16118383
AT1TE53130	+	16140518	16140537
AT1TE53135	-	16140538	16141697
AT1TE53180	+	16148564	16148859
AT1TE53185	+	16149294	16149589
AT1TE53190	+	16150024	16150133
AT1TE53195	-	16150358	16150840
AT1TE53290	-	16170521	16170558
AT1TE53295	-	16170559	16170633
AT1TE53300	-	16170634	16172858
AT1TE53310	-	16173880	16174642
AT1TE53320	+	16179172	16180430
AT1TE53325	+	16180431	16180663
AT1TE53330	+	16180929	16183960
AT1TE53335	+	16183961	16184090
AT1TE53340	+	16184091	16184123
AT1TE53345	+	16184124	16184156
AT1TE53350	+	16185008	16188262
AT1TE53355	-	16185426	16185549
AT1TE53365	+	16191359	16191405
AT1TE53370	+	16191406	16193455
AT1TE53375	+	16193456	16195793
AT1TE53390	+	16197106	16201156
AT1TE53405	+	16211500	16212301
AT1TE53410	+	16213862	16213973
AT1TE53415	+	16213974	16216281
AT1TE53420	-	16219245	16219603
AT1TE53425	-	16222567	16222925
AT1TE53430	-	16225889	16226395
AT1TE53435	+	16227801	16228125
AT1TE53500	-	16252225	16252544
AT1TE53615	+	16281177	16281819
AT1TE53620	+	16281823	16282182
AT1TE53625	-	16282183	16282581
AT1TE53630	+	16283050	16283719
AT1TE53635	-	16283927	16293484
AT1TE53640	+	16294015	16294177
AT1TE53645	+	16294283	16294695
AT1TE53650	+	16294696	16296630
AT1TE53655	-	16296635	16296920
AT1TE53660	-	16298721	16305425
AT1TE53665	+	16305956	16307630
AT1TE53670	+	16307631	16307690
AT1TE53675	-	16307691	16307920
AT1TE53680	-	16309190	16309290
AT1TE53685	+	16309291	16309782
AT1TE53690	+	16309783	16310034
AT1TE53695	-	16310035	16310163
AT1TE53700	-	16310164	16310235
AT1TE53725	+	16321282	16321592
AT1TE53730	+	16322439	16322720
AT1TE53735	+	16324047	16326798
AT1TE53740	+	16326799	16326843
AT1TE53765	+	16331687	16341996
AT1TE53840	-	16350516	16350978
AT1TE53845	-	16350979	16350999
AT1TE53850	-	16351067	16351210
AT1TE53855	-	16351211	16351260
AT1TE53860	-	16351261	16352817
AT1TE53865	+	16352819	16352857
AT1TE53870	+	16352858	16353525
AT1TE53895	+	16355862	16356978
AT1TE53900	-	16356979	16357460
AT1TE53905	-	16357461	16357484
AT1TE53915	-	16362461	16363615
AT1TE53920	+	16363616	16363654
AT1TE53955	+	16370625	16370980
AT1TE53960	+	16370981	16372354
AT1TE53965	-	16372396	16372407
AT1TE53970	-	16372411	16377457
AT1TE53975	+	16377458	16382082
AT1TE53980	+	16380156	16380192
AT1TE53985	-	16380220	16381398
AT1TE53990	-	16382484	16382550
AT1TE53995	-	16382551	16390123
AT1TE54005	-	16395228	16400259
AT1TE54010	+	16396438	16396793
AT1TE54015	+	16398580	16399409
AT1TE54075	-	16409172	16410381
AT1TE54120	-	16423573	16426584
AT1TE54175	-	16434950	16435012
AT1TE54185	-	16435918	16435980
AT1TE54190	-	16436395	16436458
AT1TE54235	+	16452311	16453674
AT1TE54240	+	16453675	16453729
AT1TE54245	+	16454098	16455098
AT1TE54250	-	16456237	16457690
AT1TE54275	-	16460059	16460224
AT1TE54280	+	16461000	16461053
AT1TE54285	-	16461086	16461516
AT1TE54290	-	16462397	16462575
AT1TE54295	+	16462655	16463271
AT1TE54300	-	16464044	16464410
AT1TE54305	-	16464413	16464516
AT1TE54310	+	16465041	16465960
AT1TE54340	-	16477062	16477477
AT1TE54345	-	16477675	16477788
AT1TE54350	-	16477789	16479427
AT1TE54355	-	16478273	16478315
AT1TE54360	+	16479441	16479603
AT1TE54420	+	16499352	16499812
AT1TE54440	+	16503844	16505380
AT1TE54445	-	16504017	16505109
AT1TE54580	+	16553914	16554155
AT1TE54585	-	16554156	16559509
AT1TE54590	+	16559510	16560298
AT1TE54595	+	16560299	16560412
AT1TE54600	+	16560413	16561330
AT1TE54755	-	16609846	16609926
AT1TE54760	+	16609929	16614023
AT1TE54805	-	16628477	16639674
AT1TE54880	-	16652500	16653165
AT1TE54885	-	16653331	16653927
AT1TE54960	+	16675972	16676135
AT1TE54965	-	16676136	16676175
AT1TE55015	+	16687698	16688709
AT1TE55020	-	16688710	16689497
AT1TE55120	-	16707137	16707334
AT1TE55125	+	16707512	16707811
AT1TE55130	-	16708283	16708360
AT1TE55320	-	16744819	16753562
AT1TE55790	-	16855723	16855768
AT1TE55795	-	16855769	16860480
AT1TE55800	-	16860485	16860958
AT1TE55895	+	16881779	16882366
AT1TE55900	+	16881895	16882133
AT1TE55905	+	16882367	16882395
AT1TE55910	-	16884625	16885382
AT1TE55915	-	16886906	16887349
AT1TE55920	-	16888263	16889469
AT1TE56135	+	16945281	16964636
AT1TE56365	+	17019462	17021058
AT1TE56370	-	17022075	17022201
AT1TE56420	+	17037473	17052479
AT1TE56425	+	17037505	17052461
AT1TE56505	-	17073792	17076929
AT1TE56990	+	17198607	17199899
AT1TE56995	+	17200052	17200164
AT1TE57000	+	17200261	17200334
AT1TE57060	+	17217661	17218605
AT1TE57065	+	17218606	17218646
AT1TE57215	+	17259832	17259966
AT1TE57220	+	17259967	17263879
AT1TE57225	+	17263880	17264247
AT1TE57630	+	17406756	17407184
AT1TE57650	-	17408893	17408984
AT1TE57655	-	17408985	17411506
AT1TE57660	-	17411526	17411556
AT1TE57665	+	17411863	17412011
AT1TE57670	-	17412554	17412785
AT1TE57675	-	17412786	17413411
AT1TE57680	-	17413412	17413728
AT1TE57685	-	17413903	17414327
AT1TE57690	-	17414328	17414382
AT1TE57695	-	17414426	17415568
AT1TE57700	+	17415587	17415745
AT1TE57705	+	17416347	17416650
AT1TE57710	+	17417918	17418646
AT1TE58055	+	17517462	17517923
AT1TE58060	+	17517924	17518167
AT1TE58325	-	17573754	17574362
AT1TE58330	+	17575590	17575992
AT1TE58335	-	17576550	17577104
AT1TE58340	+	17578528	17578569
AT1TE58345	-	17578570	17579885
AT1TE58350	-	17579886	17580122
AT1TE58455	-	17610462	17614355
AT1TE58480	+	17622319	17623065
AT1TE58485	+	17623066	17623093
AT1TE58490	+	17624094	17624327
AT1TE58495	+	17624328	17624398
AT1TE58825	+	17717189	17718449
AT1TE59510	+	17932537	17933541
AT1TE59675	-	17983092	17983196
AT1TE59755	+	18016830	18022103
AT1TE59760	+	18022307	18022419
AT1TE60180	+	18158173	18167162
AT1TE60640	-	18303593	18306306
AT1TE60655	-	18306307	18306356
AT1TE60660	+	18306357	18306444
AT1TE60665	+	18306445	18308120
AT1TE61140	+	18452546	18452782
AT1TE61790	-	18646127	18646726
AT1TE62470	-	18850043	18858550
AT1TE62585	+	18898027	18899138
AT1TE62820	-	18969777	18973054
AT1TE62825	-	18973463	18975164
AT1TE65120	-	19709550	19710518
AT1TE65150	-	19718375	19718546
AT1TE65190	+	19728969	19729164
AT1TE65195	+	19729165	19729189
AT1TE65200	+	19729190	19729685
AT1TE65205	+	19729686	19738850
AT1TE65225	+	19735558	19736330
AT1TE67200	-	20337814	20338468
AT1TE67640	+	20479529	20479565
AT1TE67645	-	20479566	20481594
AT1TE68395	-	20713122	20714916
AT1TE70175	-	21243540	21244042
AT1TE70190	-	21247989	21252870
AT1TE70805	-	21453797	21459655
AT1TE70810	+	21459656	21459734
AT1TE71045	-	21528660	21533516
AT1TE71215	-	21586361	21586735
AT1TE71300	-	21611770	21612238
AT1TE71310	+	21613589	21614317
AT1TE71315	+	21614318	21614520
AT1TE71790	-	21758028	21758854
AT1TE71795	-	21758855	21758920
AT1TE71800	-	21758921	21758941
AT1TE71805	-	21758969	21759579
AT1TE71950	-	21800603	21805416
AT1TE72060	-	21836861	21841674
AT1TE72970	-	22104309	22108994
AT1TE73340	+	22209695	22210115
AT1TE73345	+	22210116	22211744
AT1TE73350	+	22211745	22211876
AT1TE78720	-	23930110	23935425
AT1TE78725	-	23934061	23934167
AT1TE78730	-	23934170	23934193
AT1TE78735	-	23934194	23934239
AT1TE78740	-	23935690	23935852
AT1TE79070	+	24045346	24045660
AT1TE87980	-	26885444	26886115
AT1TE87985	-	26886116	26886184
AT1TE90030	+	27518620	27518642
AT1TE96100	+	29382646	29384454
AT2TE00015	-	13072	29426
AT2TE00020	+	29428	30317
AT2TE00025	+	30318	31444
AT2TE00030	+	31445	42029
AT2TE00035	+	31487	33553
AT2TE00045	+	34380	36436
AT2TE00075	-	42129	49796
AT2TE00110	-	58682	64005
AT2TE00115	-	64006	68112
AT2TE00120	-	65071	67094
AT2TE00140	-	71652	71802
AT2TE00145	-	71803	72196
AT2TE00150	-	72206	72240
AT2TE00795	-	204538	204685
AT2TE01000	-	243803	249210
AT2TE03610	-	819642	819713
AT2TE03620	+	823018	823145
AT2TE03625	+	824785	825020
AT2TE04085	+	909733	914340
AT2TE04090	+	914341	915292
AT2TE04135	+	931661	931729
AT2TE04145	+	932540	933983
AT2TE04150	-	933323	933515
AT2TE04155	-	933516	933802
AT2TE04160	-	934042	934253
AT2TE04525	-	1011230	1012989
AT2TE04875	-	1085929	1086585
AT2TE05410	-	1199025	1203651
AT2TE05415	-	1203652	1203672
AT2TE05420	-	1204269	1205402
AT2TE05755	-	1264724	1271837
AT2TE05855	-	1293562	1294494
AT2TE05875	-	1297711	1297906
AT2TE05880	-	1297907	1298508
AT2TE05885	+	1298509	1298952
AT2TE05890	+	1298965	1298988
AT2TE05895	+	1298989	1300166
AT2TE05910	-	1300849	1301486
AT2TE05925	+	1303565	1303993
AT2TE05930	+	1303994	1304076
AT2TE05935	+	1304672	1304722
AT2TE05940	+	1304723	1304855
AT2TE05945	+	1304856	1305623
AT2TE05960	+	1309705	1309799
AT2TE05965	-	1309800	1310537
AT2TE05970	+	1311154	1311653
AT2TE05975	+	1311654	1311711
AT2TE05980	+	1312740	1314080
AT2TE06390	-	1388829	1393898
AT2TE06405	+	1395257	1399513
AT2TE06590	+	1432627	1433605
AT2TE06595	+	1433767	1434000
AT2TE06600	+	1434010	1434460
AT2TE06605	-	1434461	1434567
AT2TE06610	+	1434586	1435115
AT2TE06615	+	1435116	1435375
AT2TE06620	+	1435376	1437964
AT2TE06625	+	1437966	1438005
AT2TE06785	+	1464638	1465326
AT2TE06930	+	1498929	1499390
AT2TE06935	+	1499391	1499923
AT2TE06955	+	1505382	1513547
AT2TE06995	+	1522000	1522713
AT2TE07145	-	1547658	1552030
AT2TE07300	+	1587373	1587639
AT2TE07370	-	1598730	1598965
AT2TE07375	-	1599571	1599596
AT2TE07380	-	1599597	1600788
AT2TE07425	-	1607834	1609412
AT2TE07460	+	1613975	1617957
AT2TE07490	-	1618497	1618677
AT2TE07550	-	1629641	1637478
AT2TE07655	-	1653400	1653773
AT2TE07720	+	1664706	1665229
AT2TE07745	+	1670441	1672760
AT2TE08135	-	1758537	1766566
AT2TE08160	+	1772222	1773631
AT2TE08165	-	1773702	1774813
AT2TE08190	-	1777026	1777224
AT2TE08200	-	1778041	1778164
AT2TE08265	-	1792477	1793631
AT2TE08270	-	1793632	1793660
AT2TE08275	+	1793704	1796051
AT2TE08280	+	1796433	1796602
AT2TE08285	-	1797230	1797807
AT2TE08295	+	1801234	1801733
AT2TE08300	-	1801734	1803469
AT2TE08320	-	1804015	1821231
AT2TE08375	-	1829377	1829432
AT2TE08380	-	1829433	1829453
AT2TE08385	-	1829454	1832045
AT2TE08670	-	1887173	1887576
AT2TE08675	-	1887863	1888058
AT2TE08685	-	1888877	1889000
AT2TE08945	+	1946099	1946358
AT2TE08950	-	1946489	1946645
AT2TE08955	+	1946837	1946861
AT2TE08960	+	1946862	1947070
AT2TE08965	+	1947071	1947589
AT2TE09205	-	1995885	2010493
AT2TE09375	-	2041961	2054214
AT2TE09410	-	2061853	2062674
AT2TE09420	+	2063328	2063898
AT2TE09425	-	2064977	2065078
AT2TE09430	-	2065086	2066947
AT2TE09490	+	2074038	2075014
AT2TE09555	+	2088274	2088693
AT2TE09565	-	2091081	2092823
AT2TE09570	-	2092824	2096396
AT2TE09575	-	2093411	2094317
AT2TE09600	-	2101048	2101411
AT2TE09605	+	2102762	2103470
AT2TE09625	+	2105627	2106805
AT2TE09650	-	2115376	2115739
AT2TE09655	-	2116782	2116881
AT2TE09685	-	2121883	2129086
AT2TE09885	+	2153886	2157850
AT2TE09890	-	2154867	2155876
AT2TE09895	+	2156279	2156449
AT2TE09955	+	2164240	2167687
AT2TE10115	-	2195959	2196824
AT2TE10120	-	2196825	2196901
AT2TE10260	-	2220283	2221183
AT2TE10265	-	2221184	2222412
AT2TE10340	-	2233689	2234032
AT2TE10345	+	2234033	2234098
AT2TE10355	-	2236524	2240576
AT2TE10375	-	2244788	2245626
AT2TE10380	-	2245927	2246165
AT2TE10385	-	2246166	2256071
AT2TE10390	-	2256072	2256114
AT2TE10395	-	2256115	2256602
AT2TE10490	+	2273546	2274107
AT2TE10500	+	2280052	2282260
AT2TE10570	+	2295764	2295822
AT2TE10575	+	2295823	2296320
AT2TE10580	+	2296321	2296396
AT2TE10585	+	2296809	2298012
AT2TE10615	-	2299819	2301748
AT2TE10880	+	2358734	2359046
AT2TE10885	-	2360545	2361426
AT2TE10940	-	2373256	2374257
AT2TE10945	+	2374267	2378351
AT2TE10975	+	2390867	2399526
AT2TE11025	+	2413630	2413860
AT2TE11110	-	2436991	2442257
AT2TE11125	-	2443911	2445957
AT2TE11140	-	2446758	2447738
AT2TE11165	-	2454754	2460912
AT2TE11200	+	2461015	2461121
AT2TE11205	+	2461573	2461722
AT2TE11210	+	2461723	2468220
AT2TE11215	+	2462887	2463437
AT2TE11220	-	2463438	2464618
AT2TE11250	-	2469088	2470291
AT2TE11255	+	2470292	2470887
AT2TE11260	-	2471482	2472653
AT2TE11275	-	2473159	2473828
AT2TE11280	-	2474104	2474560
AT2TE11400	-	2514796	2517445
AT2TE11405	-	2516558	2516870
AT2TE11435	-	2523628	2527696
AT2TE11485	-	2535980	2536160
AT2TE11500	-	2539098	2541784
AT2TE11535	-	2561712	2562662
AT2TE11540	-	2562807	2570721
AT2TE11560	-	2576246	2578238
AT2TE11695	-	2602445	2603913
AT2TE11735	-	2609183	2610897
AT2TE11805	+	2632427	2635804
AT2TE11810	+	2636197	2637020
AT2TE11815	+	2638829	2648146
AT2TE11885	+	2660733	2660932
AT2TE11890	+	2660933	2664197
AT2TE11900	+	2666852	2678070
AT2TE11925	-	2681639	2685667
AT2TE11930	+	2685671	2688356
AT2TE11935	-	2688360	2689568
AT2TE11940	+	2689571	2689631
AT2TE11985	-	2699306	2709961
AT2TE11990	+	2699621	2700769
AT2TE12025	-	2709962	2712858
AT2TE12030	+	2712870	2720791
AT2TE12085	-	2732191	2732463
AT2TE12090	-	2732761	2732861
AT2TE12095	-	2732862	2734484
AT2TE12115	-	2739756	2743693
AT2TE12140	+	2745602	2752267
AT2TE12145	+	2746008	2747862
AT2TE12225	-	2765875	2779421
AT2TE12230	+	2771093	2773115
AT2TE12260	+	2779422	2780084
AT2TE12265	+	2780085	2781856
AT2TE12335	+	2805776	2806529
AT2TE12340	-	2808057	2808832
AT2TE12350	-	2811677	2813111
AT2TE12355	+	2813112	2813637
AT2TE12360	-	2813638	2814134
AT2TE12365	-	2814392	2814480
AT2TE12370	-	2815403	2815724
AT2TE12375	+	2815727	2817932
AT2TE12380	+	2818364	2818527
AT2TE12385	+	2818528	2818656
AT2TE12390	+	2818657	2822099
AT2TE12405	+	2822414	2823046
AT2TE12410	-	2823236	2823694
AT2TE12415	+	2824391	2825263
AT2TE12435	+	2832360	2833658
AT2TE12450	+	2838792	2841580
AT2TE12570	+	2884699	2885445
AT2TE12575	+	2885741	2886228
AT2TE12580	-	2886316	2886877
AT2TE12615	+	2892238	2892308
AT2TE12620	-	2892762	2892922
AT2TE12625	-	2893671	2893823
AT2TE12660	+	2902327	2907114
AT2TE12680	+	2911224	2911371
AT2TE12710	+	2913721	2914569
AT2TE12820	-	2940088	2941103
AT2TE12960	+	2971053	2973437
AT2TE12965	+	2973438	2973624
AT2TE13025	+	2985781	2987303
AT2TE13035	-	2990712	2990735
AT2TE13040	-	2990736	2991799
AT2TE13045	-	2991800	2991915
AT2TE13070	-	2998275	2999732
AT2TE13075	-	2999733	2999823
AT2TE13080	+	3000610	3005280
AT2TE13085	+	3003311	3003380
AT2TE13090	+	3003610	3003640
AT2TE13100	+	3007085	3007105
AT2TE13105	+	3007106	3008064
AT2TE13115	+	3010234	3012120
AT2TE13120	+	3011098	3011157
AT2TE13125	+	3012121	3012252
AT2TE13165	-	3023979	3024326
AT2TE13170	-	3024721	3025681
AT2TE13175	-	3025682	3025722
AT2TE13180	-	3025825	3026012
AT2TE13185	-	3026940	3027035
AT2TE13195	-	3030583	3030624
AT2TE13200	-	3030625	3031807
AT2TE13205	-	3033101	3033363
AT2TE13210	+	3034686	3035098
AT2TE13215	-	3036099	3036396
AT2TE13225	+	3039217	3039783
AT2TE13230	+	3040090	3040902
AT2TE13325	-	3059455	3060800
AT2TE13330	+	3060843	3061223
AT2TE13335	+	3061226	3074304
AT2TE13385	-	3083901	3089465
AT2TE13390	-	3089466	3092285
AT2TE13395	-	3092286	3092476
AT2TE13400	-	3092478	3092521
AT2TE13405	-	3092727	3092767
AT2TE13410	+	3092768	3093018
AT2TE13415	+	3094819	3094958
AT2TE13420	+	3094959	3096555
AT2TE13445	-	3107312	3112016
AT2TE13450	-	3109366	3109638
AT2TE13455	+	3109699	3109830
AT2TE13460	+	3109831	3109911
AT2TE13465	+	3109912	3110722
AT2TE13470	+	3112017	3112088
AT2TE13520	+	3121462	3131227
AT2TE13525	+	3131276	3132260
AT2TE13530	+	3132541	3132769
AT2TE13535	+	3132839	3132899
AT2TE13545	+	3135152	3136153
AT2TE13550	+	3136154	3136587
AT2TE13555	-	3137309	3137332
AT2TE13560	-	3137333	3138757
AT2TE13565	-	3138822	3139270
AT2TE13570	-	3139305	3140892
AT2TE13755	+	3183719	3186656
AT2TE13915	+	3214482	3215078
AT2TE13935	+	3217571	3217851
AT2TE13940	-	3219203	3219668
AT2TE13950	-	3222763	3233777
AT2TE13955	-	3225680	3230914
AT2TE14540	-	3354015	3354398
AT2TE14545	-	3354399	3354428
AT2TE14650	+	3375560	3375875
AT2TE15315	+	3512579	3512733
AT2TE15380	-	3527951	3528139
AT2TE15385	+	3528626	3530337
AT2TE15390	+	3530338	3530465
AT2TE15395	-	3531449	3531671
AT2TE15400	-	3531972	3532284
AT2TE15405	-	3532285	3532345
AT2TE15410	+	3533103	3533342
AT2TE15415	+	3533343	3539331
AT2TE15520	-	3558185	3559716
AT2TE15545	+	3562161	3562224
AT2TE15550	+	3562648	3562709
AT2TE15555	+	3563123	3563192
AT2TE15565	-	3566074	3571739
AT2TE15570	-	3570251	3570524
AT2TE15575	-	3570527	3570628
AT2TE15580	+	3571775	3572916
AT2TE15655	-	3586370	3594038
AT2TE15660	-	3595720	3597852
AT2TE15675	-	3600148	3601947
AT2TE15900	-	3656851	3657191
AT2TE15910	-	3659602	3659635
AT2TE15915	-	3659636	3659668
AT2TE15920	-	3659669	3662802
AT2TE15925	-	3662803	3665323
AT2TE15930	+	3665325	3666094
AT2TE16080	-	3709995	3710129
AT2TE16090	-	3712890	3713514
AT2TE16100	-	3716043	3717274
AT2TE16105	+	3717276	3718065
AT2TE16220	-	3749179	3756447
AT2TE16230	-	3757261	3773366
AT2TE16235	-	3759619	3770286
AT2TE16270	-	3780475	3786967
AT2TE16315	-	3802280	3803283
AT2TE16340	-	3806860	3810614
AT2TE16345	-	3807768	3807863
AT2TE16400	-	3820908	3822680
AT2TE16405	-	3822681	3823001
AT2TE16410	-	3823002	3823144
AT2TE16415	-	3823145	3824099
AT2TE16420	-	3824100	3826072
AT2TE16425	-	3826073	3826773
AT2TE16430	+	3826932	3827438
AT2TE16435	-	3827439	3827657
AT2TE16510	+	3844964	3849908
AT2TE16610	+	3895587	3895922
AT2TE16615	+	3896292	3897353
AT2TE16625	-	3903022	3903772
AT2TE16645	-	3907632	3909313
AT2TE16650	+	3909770	3910726
AT2TE16795	-	3948895	3949828
AT2TE16800	-	3949834	3969917
AT2TE16845	+	3969918	3970585
AT2TE16850	-	3970603	3972203
AT2TE16890	+	3982827	3985041
AT2TE16895	-	3985047	3987146
AT2TE16900	-	3987147	3988079
AT2TE16905	-	3988080	3988212
AT2TE16910	-	3988213	3991919
AT2TE16915	+	3989407	3990435
AT2TE16920	-	3991991	3992149
AT2TE16930	-	3993568	4012197
AT2TE17095	+	4034107	4052871
AT2TE17100	+	4038980	4039037
AT2TE17110	+	4042854	4051507
AT2TE17180	+	4075418	4075795
AT2TE17185	+	4075796	4075838
AT2TE17190	+	4076770	4077044
AT2TE17195	+	4077628	4078187
AT2TE17200	+	4078188	4078242
AT2TE17205	-	4078593	4081757
AT2TE17210	-	4081760	4081806
AT2TE17330	+	4106171	4107505
AT2TE17335	-	4108160	4109823
AT2TE17340	-	4110575	4110676
AT2TE17345	-	4111036	4112132
AT2TE17355	+	4112189	4112431
AT2TE17430	-	4139529	4141143
AT2TE17435	-	4141144	4141189
AT2TE17440	+	4141190	4141778
AT2TE17445	-	4141779	4141812
AT2TE17450	-	4141813	4142504
AT2TE17455	+	4142505	4144162
AT2TE17460	+	4144163	4144199
AT2TE17465	+	4144200	4144256
AT2TE17470	-	4144257	4144286
AT2TE17475	+	4144287	4144322
AT2TE17480	-	4144394	4144582
AT2TE17485	-	4144583	4146336
AT2TE17490	+	4146795	4148059
AT2TE17495	+	4148065	4148524
AT2TE17500	+	4148525	4148785
AT2TE17505	-	4149860	4150393
AT2TE17510	-	4150522	4150726
AT2TE17515	-	4151465	4151572
AT2TE17520	+	4151573	4152151
AT2TE17525	-	4152415	4152777
AT2TE17530	-	4153418	4153746
AT2TE17535	+	4153747	4155190
AT2TE17540	+	4155191	4155636
AT2TE17545	+	4155637	4155751
AT2TE17550	+	4155762	4156319
AT2TE17555	-	4156368	4156452
AT2TE17560	-	4156453	4156477
AT2TE17565	-	4156478	4160509
AT2TE17580	+	4162748	4164586
AT2TE17590	-	4166392	4168131
AT2TE17595	-	4168133	4169386
AT2TE17600	+	4169393	4176637
AT2TE17765	+	4218333	4218915
AT2TE17770	+	4219773	4221542
AT2TE17775	+	4221718	4222143
AT2TE17780	+	4222144	4223059
AT2TE17785	-	4223060	4223665
AT2TE17790	-	4223666	4224094
AT2TE17795	-	4224239	4226034
AT2TE17800	-	4226035	4226104
AT2TE17805	-	4226105	4227850
AT2TE17875	+	4243739	4251485
AT2TE17880	-	4253321	4256330
AT2TE17975	+	4272132	4281295
AT2TE18035	+	4303441	4307387
AT2TE18045	-	4308650	4308964
AT2TE18050	+	4309026	4309200
AT2TE18055	-	4309387	4310257
AT2TE18060	-	4310258	4310293
AT2TE18065	-	4311207	4311235
AT2TE18070	-	4311236	4311374
AT2TE18075	-	4311375	4311929
AT2TE18095	+	4314863	4315151
AT2TE18185	-	4333666	4335046
AT2TE18190	+	4335047	4335091
AT2TE18195	-	4335700	4335859
AT2TE18200	-	4336348	4337003
AT2TE18205	-	4337004	4337089
AT2TE18210	-	4337371	4337541
AT2TE18240	+	4343480	4344832
AT2TE18370	-	4373845	4373944
AT2TE18375	-	4373945	4377283
AT2TE18450	-	4411419	4415017
AT2TE18505	-	4426963	4429181
AT2TE18510	-	4429182	4429251
AT2TE18515	-	4429612	4429680
AT2TE18520	-	4429681	4429924
AT2TE18525	+	4429925	4429952
AT2TE18530	+	4429953	4432529
AT2TE18535	+	4430439	4430919
AT2TE18540	+	4432530	4432718
AT2TE18545	+	4432719	4435373
AT2TE18550	+	4434085	4434203
AT2TE18555	+	4435374	4435415
AT2TE18560	+	4435416	4435763
AT2TE18565	-	4435764	4435789
AT2TE18570	-	4435790	4436293
AT2TE18580	+	4436341	4437095
AT2TE18585	+	4437096	4437712
AT2TE18590	-	4437713	4437881
AT2TE18595	+	4437882	4438023
AT2TE18600	+	4438024	4438062
AT2TE18605	+	4438063	4441687
AT2TE18610	+	4440042	4440143
AT2TE18665	+	4449151	4452917
AT2TE18695	+	4459612	4464104
AT2TE18710	+	4467181	4477450
AT2TE18830	-	4497733	4507847
AT2TE18895	-	4525163	4529583
AT2TE18910	-	4529584	4529626
AT2TE18915	+	4529627	4531103
AT2TE18920	+	4533054	4543042
AT2TE18925	+	4543044	4543255
AT2TE18930	+	4543256	4543732
AT2TE18935	+	4543733	4545901
AT2TE18940	+	4545903	4547596
AT2TE18980	-	4565608	4573213
AT2TE18985	+	4573224	4573663
AT2TE19010	+	4590154	4591259
AT2TE19015	-	4591943	4592040
AT2TE19020	-	4592041	4592969
AT2TE19025	+	4592970	4596620
AT2TE19070	-	4605947	4616377
AT2TE19075	+	4612059	4615078
AT2TE19080	-	4616378	4616416
AT2TE19085	-	4616417	4616623
AT2TE19090	+	4616624	4616712
AT2TE19160	+	4630627	4631599
AT2TE19170	+	4631772	4631823
AT2TE19175	+	4631824	4633241
AT2TE19280	+	4653079	4653302
AT2TE19285	+	4654512	4654886
AT2TE19290	+	4655867	4656342
AT2TE19295	+	4656343	4656391
AT2TE19300	+	4656914	4657100
AT2TE19305	+	4657101	4657278
AT2TE19310	+	4657346	4657638
AT2TE19315	-	4658079	4658105
AT2TE19320	-	4658106	4658133
AT2TE19325	+	4658134	4658738
AT2TE19340	+	4659935	4660445
AT2TE19345	+	4660446	4661430
AT2TE19350	+	4661431	4661639
AT2TE19355	+	4663439	4665393
AT2TE19475	+	4691735	4694151
AT2TE19595	-	4731675	4732100
AT2TE19600	-	4732117	4733182
AT2TE19650	-	4744782	4746033
AT2TE19655	-	4746044	4746285
AT2TE19660	-	4746693	4748407
AT2TE19695	-	4753699	4754671
AT2TE19735	-	4759874	4763902
AT2TE19765	+	4767351	4767512
AT2TE19770	+	4767513	4768697
AT2TE19775	+	4769357	4769706
AT2TE19800	+	4776917	4777005
AT2TE19810	-	4778868	4779261
AT2TE19815	-	4779262	4779284
AT2TE19820	-	4780893	4780931
AT2TE19825	-	4780932	4782413
AT2TE19860	-	4790651	4791891
AT2TE19885	-	4799916	4802829
AT2TE19950	-	4815044	4815084
AT2TE19970	-	4819411	4823013
AT2TE19975	-	4823014	4823059
AT2TE19980	-	4823074	4823579
AT2TE19985	-	4823993	4825746
AT2TE20015	-	4833479	4834695
AT2TE20020	+	4834715	4836281
AT2TE20025	+	4836363	4836903
AT2TE20030	+	4836904	4837335
AT2TE20060	+	4843638	4845378
AT2TE20065	-	4844230	4844970
AT2TE20105	+	4859666	4863644
AT2TE20110	+	4860738	4862369
AT2TE20130	-	4866552	4866890
AT2TE20135	+	4866895	4867752
AT2TE20140	-	4868311	4876507
AT2TE20155	+	4879085	4879615
AT2TE20160	-	4880212	4895125
AT2TE20190	-	4903134	4904826
AT2TE20195	-	4905726	4905805
AT2TE20220	-	4917368	4926156
AT2TE20225	-	4926787	4926817
AT2TE20230	-	4926818	4927478
AT2TE20250	+	4932171	4932252
AT2TE20255	-	4932253	4941013
AT2TE20295	+	4949873	4952157
AT2TE20300	-	4952158	4952203
AT2TE20330	+	4955773	4966243
AT2TE20420	-	4980419	4985215
AT2TE20435	+	4985551	4997157
AT2TE20445	-	4998845	5001035
AT2TE20450	+	5001037	5003035
AT2TE20455	+	5003346	5003660
AT2TE20500	+	5010351	5011447
AT2TE20505	+	5010403	5010724
AT2TE20685	+	5039663	5040860
AT2TE20735	+	5048077	5055494
AT2TE20740	+	5051556	5051606
AT2TE20755	-	5055570	5056781
AT2TE20810	-	5064802	5066864
AT2TE20815	-	5067511	5069211
AT2TE20895	+	5089898	5090286
AT2TE20900	-	5091118	5091727
AT2TE20940	+	5099595	5105016
AT2TE20945	-	5102577	5104635
AT2TE20950	-	5105911	5106105
AT2TE20955	-	5106115	5106922
AT2TE20960	+	5107175	5118626
AT2TE20965	+	5112983	5117324
AT2TE21065	+	5147842	5152725
AT2TE21100	+	5154342	5155364
AT2TE21105	+	5155365	5160834
AT2TE21110	+	5156654	5158281
AT2TE21125	-	5161712	5165742
AT2TE21130	-	5165743	5165828
AT2TE21150	+	5168439	5168502
AT2TE21155	-	5168815	5170092
AT2TE21235	+	5183313	5183780
AT2TE21240	-	5184637	5184975
AT2TE21245	+	5185409	5185677
AT2TE21250	+	5185678	5186688
AT2TE21255	+	5186819	5187213
AT2TE21265	+	5189848	5192733
AT2TE21270	-	5193569	5194051
AT2TE21275	-	5194052	5194093
AT2TE21280	-	5194097	5195808
AT2TE21285	-	5195809	5195838
AT2TE21290	-	5196566	5196879
AT2TE21295	-	5197834	5220829
AT2TE21300	-	5220830	5220963
AT2TE21305	-	5220964	5221531
AT2TE21310	-	5222181	5222401
AT2TE21315	-	5222418	5222551
AT2TE21320	-	5224291	5224454
AT2TE21325	+	5224917	5225092
AT2TE21330	-	5225190	5225322
AT2TE21335	-	5225857	5226078
AT2TE21340	-	5226546	5226898
AT2TE21345	-	5227872	5234271
AT2TE21350	-	5234272	5235205
AT2TE21360	-	5236238	5245060
AT2TE21365	-	5245066	5245401
AT2TE21370	-	5245633	5245734
AT2TE21395	+	5254526	5255761
AT2TE21455	+	5269527	5271833
AT2TE21460	+	5270696	5271342
AT2TE21485	+	5276292	5278492
AT2TE21490	+	5277418	5278067
AT2TE21510	+	5283027	5287491
AT2TE21515	+	5284135	5285311
AT2TE21520	+	5285313	5285352
AT2TE21525	+	5285353	5286979
AT2TE21530	-	5287492	5296444
AT2TE21535	-	5289670	5291594
AT2TE21540	-	5291595	5291620
AT2TE21545	-	5291684	5292595
AT2TE21550	-	5292596	5292667
AT2TE21555	-	5292668	5293990
AT2TE21570	+	5298318	5298394
AT2TE21575	+	5298395	5298576
AT2TE21580	+	5298639	5298845
AT2TE21585	-	5299001	5299668
AT2TE21590	-	5299669	5299871
AT2TE21600	+	5303764	5303857
AT2TE21605	-	5304313	5313917
AT2TE21610	+	5313926	5319945
AT2TE21615	+	5320272	5320342
AT2TE21620	+	5320343	5322018
AT2TE21625	+	5322019	5322118
AT2TE21630	-	5323465	5323486
AT2TE21635	-	5323487	5323856
AT2TE21645	-	5326423	5326899
AT2TE21650	-	5326900	5327118
AT2TE21660	+	5329844	5330214
AT2TE21670	-	5332649	5333819
AT2TE21675	+	5334110	5334141
AT2TE21680	+	5334152	5336654
AT2TE21695	+	5336660	5337276
AT2TE21700	+	5337969	5338489
AT2TE21705	+	5338490	5344899
AT2TE21710	-	5345115	5353367
AT2TE21760	-	5372198	5388209
AT2TE21765	-	5374897	5384619
AT2TE21770	-	5384232	5384252
AT2TE21790	-	5388210	5388951
AT2TE21795	-	5388974	5390155
AT2TE21800	-	5390156	5390175
AT2TE21805	-	5390176	5392180
AT2TE21810	+	5394069	5394100
AT2TE21815	+	5394101	5395674
AT2TE21820	+	5395675	5395947
AT2TE21855	+	5401792	5406731
AT2TE21860	+	5408623	5409085
AT2TE21865	-	5410170	5410994
AT2TE21870	-	5411003	5411835
AT2TE21875	-	5413535	5413801
AT2TE21880	-	5413802	5414971
AT2TE21890	+	5415269	5415425
AT2TE21910	-	5417848	5417942
AT2TE21920	-	5420275	5420320
AT2TE21925	-	5420321	5421936
AT2TE21930	-	5421937	5421977
AT2TE21970	+	5430378	5434712
AT2TE21985	-	5434771	5435113
AT2TE21995	+	5437555	5437952
AT2TE22000	+	5438426	5438523
AT2TE22005	-	5439035	5440245
AT2TE22020	-	5442935	5443387
AT2TE22055	-	5453985	5454068
AT2TE22065	-	5455200	5460350
AT2TE22070	-	5460351	5460409
AT2TE22075	-	5460410	5463898
AT2TE22080	-	5460726	5460922
AT2TE22090	-	5463907	5464037
AT2TE22095	-	5464038	5464516
AT2TE22100	+	5464517	5464550
AT2TE22110	-	5464774	5465558
AT2TE22115	-	5465561	5465605
AT2TE22120	-	5466077	5467252
AT2TE22125	-	5468723	5469054
AT2TE22130	-	5470076	5470152
AT2TE22135	+	5470690	5471270
AT2TE22170	+	5475455	5476789
AT2TE22175	-	5476790	5477805
AT2TE22180	+	5477806	5478144
AT2TE22185	+	5478145	5486211
AT2TE22190	-	5480654	5481235
AT2TE22220	+	5486288	5488760
AT2TE22235	-	5490826	5497549
AT2TE22245	+	5498350	5503163
AT2TE22270	+	5510968	5512085
AT2TE22275	+	5512968	5513192
AT2TE22295	-	5516426	5518253
AT2TE22310	-	5523706	5523944
AT2TE22315	-	5524691	5527163
AT2TE22325	+	5529621	5529645
AT2TE22330	+	5529646	5530731
AT2TE22335	-	5530736	5534688
AT2TE22340	+	5534788	5534871
AT2TE22345	-	5535794	5541141
AT2TE22350	-	5541330	5541574
AT2TE22355	-	5541577	5541786
AT2TE22360	+	5542998	5543136
AT2TE22490	+	5567094	5567690
AT2TE22495	+	5568055	5572164
AT2TE22500	+	5570659	5570711
AT2TE22525	+	5586073	5586212
AT2TE22580	-	5598502	5598543
AT2TE22585	+	5598554	5599945
AT2TE22785	-	5652241	5652409
AT2TE22790	+	5652613	5653061
AT2TE22795	+	5653078	5653677
AT2TE22855	-	5664549	5664748
AT2TE22860	-	5664786	5665202
AT2TE22865	-	5665203	5665648
AT2TE22870	+	5665681	5665959
AT2TE22895	+	5672577	5672754
AT2TE22905	+	5675240	5676267
AT2TE23140	+	5723268	5724165
AT2TE23145	+	5724166	5724229
AT2TE23155	-	5726803	5727495
AT2TE23175	-	5732675	5734484
AT2TE23240	+	5743883	5744994
AT2TE23490	-	5784518	5784907
AT2TE23495	-	5784923	5785304
AT2TE23500	-	5785721	5785971
AT2TE23505	+	5785984	5787171
AT2TE23510	-	5787185	5793821
AT2TE23515	-	5793822	5794810
AT2TE23520	-	5794815	5795228
AT2TE23555	-	5805333	5805627
AT2TE23560	-	5806066	5806613
AT2TE23565	-	5806155	5806290
AT2TE23570	-	5806614	5806700
AT2TE23575	-	5806853	5807115
AT2TE23580	-	5807184	5807436
AT2TE23585	+	5807731	5807773
AT2TE23590	-	5807838	5807945
AT2TE23595	-	5808076	5808232
AT2TE23600	-	5809056	5809082
AT2TE23605	-	5809083	5809201
AT2TE23610	-	5809434	5809706
AT2TE23615	-	5809848	5809913
AT2TE23665	-	5814896	5815882
AT2TE23670	-	5815883	5821972
AT2TE23705	+	5824417	5829287
AT2TE23720	+	5830704	5831531
AT2TE23745	+	5834214	5834724
AT2TE23750	-	5834882	5834978
AT2TE23755	-	5834979	5835646
AT2TE23760	-	5835698	5835736
AT2TE23765	-	5835737	5836469
AT2TE23855	+	5859781	5864510
AT2TE23890	-	5875793	5876046
AT2TE23905	-	5876508	5879225
AT2TE23940	-	5883703	5889911
AT2TE23945	-	5889953	5890175
AT2TE23950	-	5890778	5890849
AT2TE23955	-	5890850	5891150
AT2TE23960	-	5891430	5891617
AT2TE23965	-	5893404	5907208
AT2TE23970	+	5893689	5895086
AT2TE24035	-	5907950	5911630
AT2TE24045	+	5911723	5912809
AT2TE24260	-	5955935	5955954
AT2TE24265	+	5955955	5956874
AT2TE24405	+	6005952	6006404
AT2TE24410	-	6006405	6008394
AT2TE24415	-	6009022	6010918
AT2TE24420	-	6010919	6011886
AT2TE24425	-	6011887	6012049
AT2TE24430	-	6013210	6013302
AT2TE24435	+	6013573	6014113
AT2TE24440	+	6014188	6014337
AT2TE24445	-	6014339	6015577
AT2TE24450	+	6015578	6016561
AT2TE24455	-	6016734	6016755
AT2TE24460	-	6016756	6019755
AT2TE24525	-	6034109	6038246
AT2TE24610	+	6052506	6053748
AT2TE24615	+	6053771	6053972
AT2TE24680	-	6066670	6077904
AT2TE24685	-	6067880	6067923
AT2TE24730	+	6077905	6077927
AT2TE24735	+	6077928	6089438
AT2TE24820	+	6106444	6110333
AT2TE24840	-	6110794	6111090
AT2TE24845	+	6112627	6112665
AT2TE24850	-	6112666	6115592
AT2TE24860	+	6117762	6120289
AT2TE24865	+	6121208	6121888
AT2TE24870	+	6122303	6122869
AT2TE24875	+	6122870	6122973
AT2TE24880	+	6122974	6126224
AT2TE24885	+	6126225	6126337
AT2TE24900	+	6130585	6130830
AT2TE24905	+	6131820	6133741
AT2TE24910	-	6133758	6134230
AT2TE24915	-	6134231	6134738
AT2TE24920	-	6134739	6135689
AT2TE25095	+	6184004	6185311
AT2TE25100	+	6186833	6186875
AT2TE25105	+	6186876	6186908
AT2TE25110	+	6186909	6188041
AT2TE25115	-	6188061	6188479
AT2TE25175	+	6200409	6200447
AT2TE25180	+	6200448	6200526
AT2TE25185	+	6200527	6201305
AT2TE25190	+	6201311	6202036
AT2TE25200	+	6204499	6204824
AT2TE25205	+	6206382	6206476
AT2TE25210	-	6206477	6206606
AT2TE25390	+	6235394	6235561
AT2TE25395	+	6235562	6236407
AT2TE25400	+	6236439	6239470
AT2TE25405	+	6239681	6239808
AT2TE25410	+	6239809	6240659
AT2TE25415	+	6240664	6240818
AT2TE25515	+	6265484	6266162
AT2TE25520	+	6266517	6267680
AT2TE25540	-	6270361	6278181
AT2TE25545	-	6278247	6278371
AT2TE25550	-	6278373	6278435
AT2TE25840	-	6336723	6352033
AT2TE26090	+	6402484	6402929
AT2TE26095	-	6402930	6402968
AT2TE26100	-	6402969	6404741
AT2TE26225	-	6427402	6427855
AT2TE26275	+	6441069	6446836
AT2TE26280	+	6447742	6448170
AT2TE26285	-	6448671	6450069
AT2TE26380	-	6467029	6472777
AT2TE26410	-	6474355	6474677
AT2TE26470	+	6483152	6485792
AT2TE26475	+	6485793	6485880
AT2TE26480	+	6486183	6486495
AT2TE26485	+	6487250	6487285
AT2TE26610	+	6515935	6518002
AT2TE26620	-	6519650	6520870
AT2TE26625	-	6520871	6521252
AT2TE26630	-	6521805	6521838
AT2TE26635	-	6521839	6523463
AT2TE26640	-	6523778	6523874
AT2TE26645	+	6524712	6524859
AT2TE26650	+	6525188	6525454
AT2TE26680	-	6531338	6540157
AT2TE26685	-	6534125	6535279
AT2TE26780	+	6556366	6557589
AT2TE26785	+	6557649	6561480
AT2TE26790	+	6558193	6558236
AT2TE26800	+	6561481	6561878
AT2TE26830	-	6567756	6568094
AT2TE26835	+	6568140	6568376
AT2TE26900	-	6596040	6596130
AT2TE27460	+	6725461	6727015
AT2TE27465	+	6727016	6730525
AT2TE27470	+	6730526	6730848
AT2TE27480	+	6733171	6733597
AT2TE27560	-	6752076	6752950
AT2TE27565	-	6753439	6754064
AT2TE27575	-	6756905	6757457
AT2TE27585	-	6760300	6760853
AT2TE27595	-	6764301	6764634
AT2TE27670	-	6785944	6792655
AT2TE27930	+	6866100	6866480
AT2TE27935	+	6867928	6868395
AT2TE28260	+	6942848	6947653
AT2TE28265	+	6947694	6947719
AT2TE28270	-	6947720	6948551
AT2TE28280	+	6950198	6951104
AT2TE28340	-	6968827	6969197
AT2TE28345	+	6969560	6971442
AT2TE28350	+	6972442	6973250
[truncated: 4,222 more rows]
